# Supplementary material for: Association of full blood count findings with risk of mortality in children with Klebsiella pneumoniae bloodstream infection at a south african children’s hospital
Source: Springer Nature journal article supplement (doi:10.1186/s12887-023-04104-z), 2023-06-17
Supplement: MOESM1 [file 25507006]

```

1 .
2 . * Descriptions
3 . bysort hiv2: tabstat newlwcc new2wcc if hiv2s!=., by(outcome) stats (p50 p25 p75)

```

---

```

-> hiv2s = 0

```

```

Summary statistics: p50, p25, p75
by categories of: outcome (Outcome)

```

| outcome | newlwcc | new2wcc |
|---------|---------|---------|
| Alive   | 11.85   | 10.78   |
|         | 7.5     | 8.41    |
|         | 19.8    | 16.48   |
| Died    | 12.535  | 13.08   |
|         | 5.105   | 5.2     |
|         | 23.61   | 23.6    |
| Total   | 12.25   | 11.09   |
|         | 6.9     | 7.7     |
|         | 20.6    | 18.1    |

---

```

-> hiv2s = 1

```

```

Summary statistics: p50, p25, p75
by categories of: outcome (Outcome)

```

| outcome | newlwcc | new2wcc |
|---------|---------|---------|
| Alive   | 9.81    | 9.9     |
|         | 4.95    | 7       |
|         | 15.39   | 12.55   |
| Died    | 8.82    | 9.35    |
|         | 3       | 4.1     |
|         | 20.26   | 12.08   |
| Total   | 8.975   | 9.9     |
|         | 4       | 5.7     |
|         | 18      | 12.4    |

```

4 . bysort hiv2: tabstat newlneut new2neut if hiv2s!=., by(outcome) stats (p50 p25 p75)

```

---

```

-> hiv2s = 0

```

```

Summary statistics: p50, p25, p75
by categories of: outcome (Outcome)

```

| outcome | newlneut | new2neut |
|---------|----------|----------|
| Alive   | 4.86     | 4.63     |
|         | 2.86     | 2.27     |
|         | 10.18    | 8.33     |
| Died    | 4.525    | 7.955    |
|         | .745     | 1.33     |
|         | 13.05    | 14.62    |
| Total   | 4.77     | 4.66     |
|         | 2.22     | 2.1      |
|         | 11.03    | 10.06    |

---

```

-> hiv2s = 1

```

```

Summary statistics: p50, p25, p75
by categories of: outcome (Outcome)

```

| outcome | newlneut | new2neut |
|---------|----------|----------|
| Alive   | 3.69     | 3.995    |
|         | .99      | 2.31     |
|         | 8.51     | 5.56     |
| Died    | 2.9      | 3.41     |
|         | .62      | 1.41     |
|         | 8.45     | 6.29     |

| Total | 3.53 | 3.735 |
|-------|------|-------|
|       | .98  | 1.72  |
|       | 8.45 | 6.02  |

```
5 . bysort hiv2: tabstat new1band new2band if hiv2s!., by(outcome) stats (p50 p25 p75)
```

```
-> hiv2s = 0
```

```
Summary statistics: p50, p25, p75  
by categories of: outcome (Outcome)
```

| outcome | new1band | new2band |
|---------|----------|----------|
| Alive   | 1.55     | .41      |
|         | .34      | .13      |
|         | 4.28     | 1.43     |
| Died    | 2.165    | 1.025    |
|         | .24      | .27      |
|         | 4.985    | 3.3      |
| Total   | 1.6      | .49      |
|         | .28      | .17      |
|         | 4.41     | 1.98     |

```
-> hiv2s = 1
```

```
Summary statistics: p50, p25, p75  
by categories of: outcome (Outcome)
```

| outcome | new1band | new2band |
|---------|----------|----------|
| Alive   | 1.56     | .19      |
|         | .41      | .035     |
|         | 4.73     | .99      |
| Died    | 1.65     | 1.245    |
|         | .25      | .35      |
|         | 4.96     | 3.5      |
| Total   | 1.58     | .49      |
|         | .34      | .07      |
|         | 4.73     | 1.47     |

```
6 . bysort hiv2: tabstat band1perc band2perc if hiv2s!., by(outcome) stats (p50 p25 p75)
```

```
-> hiv2s = 0
```

```
Summary statistics: p50, p25, p75  
by categories of: outcome (Outcome)
```

| outcome | band1p-c | band2p-c |
|---------|----------|----------|
| Alive   | 13.04348 | 5.431573 |
|         | 4.935065 | .9756098 |
|         | 26.89655 | 12       |
| Died    | 14.04442 | 10.5     |
|         | 1.501454 | 6.010929 |
|         | 29.97014 | 25.95838 |
| Total   | 13.96825 | 6.964619 |
|         | 3.04878  | .980768  |
|         | 26.98113 | 15.98527 |

```
-> hiv2s = 1
```

```
Summary statistics: p50, p25, p75  
by categories of: outcome (Outcome)
```

| outcome | band1p-c | band2p-c |
|---------|----------|----------|
| Alive   | 19.90291 | 2.025195 |
|         | 6.8      | .472973  |
|         | 30.10101 | 11       |
| Died    | 17.02335 | 16.9746  |

|       |          |          |
|-------|----------|----------|
|       | 8        | 10       |
|       | 27.98527 | 25.95745 |
| Total | 19.00436 | 10       |
|       | 7.995619 | .9876543 |
|       | 28.04124 | 16.98842 |

```
7 . bysort hiv2: tabstat new1plat new2plat if hiv2s!=., by(outcome) stats (p50 p25 p75)
```

-> hiv2s = 0

Summary statistics: p50, p25, p75  
by categories of: outcome (Outcome)

| outcome | new1plat | new2plat |
|---------|----------|----------|
| Alive   | 194.5    | 229.5    |
|         | 66       | 100      |
|         | 394      | 472      |
| Died    | 60       | 37       |
|         | 21       | 11       |
|         | 136      | 142      |
| Total   | 140      | 181      |
|         | 44       | 56       |
|         | 308      | 430      |

-> hiv2s = 1

Summary statistics: p50, p25, p75  
by categories of: outcome (Outcome)

| outcome | new1plat | new2plat |
|---------|----------|----------|
| Alive   | 94       | 132.5    |
|         | 22       | 45       |
|         | 241      | 233.5    |
| Died    | 42       | 63.5     |
|         | 11       | 17       |
|         | 140      | 143      |
| Total   | 60.5     | 98.5     |
|         | 18       | 36       |
|         | 182.5    | 204      |

```
8 .
9 . *Hypothesis testing
10 .
11 . *HIV negative - alive
12 . signrank newlwcc=new2wcc if hiv2s==0 & outcome==0
```

Wilcoxon signed-rank test

| sign     | obs | sum ranks | expected |
|----------|-----|-----------|----------|
| positive | 55  | 2699.5    | 2575.5   |
| negative | 46  | 2451.5    | 2575.5   |
| zero     | 0   | 0         | 0        |
| all      | 101 | 5151      | 5151     |

unadjusted variance 87137.75  
adjustment for ties -0.38  
adjustment for zeros 0.00  
adjusted variance 87137.38

Ho: newlwcc = new2wcc  
z = 0.420  
Prob > |z| = 0.6744  
Exact Prob = 0.6763

```
13 . signrank newlneut=new2neut if hiv2s==0 & outcome==0
```

Wilcoxon signed-rank test

| sign | obs | sum ranks | expected |
|------|-----|-----------|----------|
|------|-----|-----------|----------|

| positive | 31 | 989.5 | 855  |
|----------|----|-------|------|
| negative | 26 | 720.5 | 855  |
| zero     | 1  | 1     | 1    |
| all      | 58 | 1711  | 1711 |

unadjusted variance    **16682.25**  
 adjustment for ties    **-0.12**  
 adjustment for zeros   **-0.25**

adjusted variance      **16681.88**

Ho: newlneut = new2neut  
 z = **1.041**  
 Prob > |z| = **0.2977**  
 Exact Prob = **0.3010**

14 . signrank newlband=new2band if hiv2s==0 & outcome==0

Wilcoxon signed-rank test

| sign     | obs | sum ranks | expected |
|----------|-----|-----------|----------|
| positive | 37  | 1262      | 850.5    |
| negative | 17  | 439       | 850.5    |
| zero     | 4   | 10        | 10       |
| all      | 58  | 1711      | 1711     |

unadjusted variance    **16682.25**  
 adjustment for ties    **0.00**  
 adjustment for zeros   **-7.50**

adjusted variance      **16674.75**

Ho: newlband = new2band  
 z = **3.187**  
 Prob > |z| = **0.0014**  
 Exact Prob = **0.0012**

15 . signrank bandlperc=band2perc if hivs==0 & outcome==0

Wilcoxon signed-rank test

| sign     | obs | sum ranks | expected |
|----------|-----|-----------|----------|
| positive | 37  | 1064      | 687.5    |
| negative | 13  | 311       | 687.5    |
| zero     | 2   | 3         | 3        |
| all      | 52  | 1378      | 1378     |

unadjusted variance    **12057.50**  
 adjustment for ties    **0.00**  
 adjustment for zeros   **-1.25**

adjusted variance      **12056.25**

Ho: bandlperc = band2perc  
 z = **3.429**  
 Prob > |z| = **0.0006**  
 Exact Prob = **0.0004**

16 . signrank newlplat=new2plat if hiv2s==0 & outcome==0

Wilcoxon signed-rank test

| sign     | obs | sum ranks | expected |
|----------|-----|-----------|----------|
| positive | 33  | 1295      | 2328     |
| negative | 63  | 3361      | 2328     |
| zero     | 0   | 0         | 0        |
| all      | 96  | 4656      | 4656     |

unadjusted variance    **74884.00**  
 adjustment for ties    **-2.62**  
 adjustment for zeros   **0.00**

adjusted variance      **74881.38**

Ho: newlplat = new2plat  
 z = **-3.775**  
 Prob > |z| = **0.0002**  
 Exact Prob = **0.0001**

```
17 .
18 . *HIV negative - dead
19 . signrank newlwcc=new2wcc if hiv2s==0 & outcome==1
```

Wilcoxon signed-rank test

| sign     | obs | sum ranks | expected |
|----------|-----|-----------|----------|
| positive | 15  | 247       | 232.5    |
| negative | 15  | 218       | 232.5    |
| zero     | 0   | 0         | 0        |
| all      | 30  | 465       | 465      |

```
unadjusted variance    2363.75
adjustment for ties      0.00
adjustment for zeros      0.00
```

```
adjusted variance      2363.75
```

```
Ho: newlwcc = new2wcc
    z = 0.298
Prob > |z| = 0.7655
Exact Prob = 0.7766
```

```
20 . signrank newlneut=new2neut if hiv2s==0 & outcome==1
```

Wilcoxon signed-rank test

| sign     | obs | sum ranks | expected |
|----------|-----|-----------|----------|
| positive | 8   | 108       | 126      |
| negative | 13  | 144       | 126      |
| zero     | 1   | 1         | 1        |
| all      | 22  | 253       | 253      |

```
unadjusted variance    948.75
adjustment for ties      0.00
adjustment for zeros    -0.25
```

```
adjusted variance      948.50
```

```
Ho: newlneut = new2neut
    z = -0.584
Prob > |z| = 0.5589
Exact Prob = 0.5769
```

```
21 . signrank newlband=new2band if hiv2s==0 & outcome==1
```

Wilcoxon signed-rank test

| sign     | obs | sum ranks | expected |
|----------|-----|-----------|----------|
| positive | 11  | 148       | 125      |
| negative | 9   | 102       | 125      |
| zero     | 2   | 3         | 3        |
| all      | 22  | 253       | 253      |

```
unadjusted variance    948.75
adjustment for ties      0.00
adjustment for zeros    -1.25
```

```
adjusted variance      947.50
```

```
Ho: newlband = new2band
    z = 0.747
Prob > |z| = 0.4549
Exact Prob = 0.4724
```

```
22 . signrank bandlperc=band2perc if hivs==0 & outcome==1
```

Wilcoxon signed-rank test

| sign     | obs | sum ranks | expected |
|----------|-----|-----------|----------|
| positive | 11  | 121       | 75       |
| negative | 4   | 29        | 75       |
| zero     | 2   | 3         | 3        |
| all      | 17  | 153       | 153      |

```
unadjusted variance    446.25
```

```

adjustment for ties      0.00
adjustment for zeros    -1.25
-----
adjusted variance      445.00

```

```

Ho: band1perc = band2perc
    z = 2.181
Prob > |z| = 0.0292
Exact Prob = 0.0283

```

```
23 . signrank new1plat=new2plat if hiv2s==0 & outcome==1
```

```
Wilcoxon signed-rank test
```

| sign     | obs | sum ranks | expected |
|----------|-----|-----------|----------|
| positive | 20  | 299       | 217.5    |
| negative | 9   | 136       | 217.5    |
| zero     | 0   | 0         | 0        |
| all      | 29  | 435       | 435      |

```

unadjusted variance    2138.75
adjustment for ties    0.00
adjustment for zeros    0.00
-----
adjusted variance      2138.75

```

```

Ho: new1plat = new2plat
    z = 1.762
Prob > |z| = 0.0780
Exact Prob = 0.0798

```

```
24 .
25 .
26 . *HIV positive- alive
```

```
27 . signrank new1wcc=new2wcc if hiv2s==1 & outcome==0
```

```
Wilcoxon signed-rank test
```

| sign     | obs | sum ranks | expected |
|----------|-----|-----------|----------|
| positive | 13  | 191       | 203      |
| negative | 15  | 215       | 203      |
| zero     | 0   | 0         | 0        |
| all      | 28  | 406       | 406      |

```

unadjusted variance    1928.50
adjustment for ties    0.00
adjustment for zeros    0.00
-----
adjusted variance      1928.50

```

```

Ho: new1wcc = new2wcc
    z = -0.273
Prob > |z| = 0.7847
Exact Prob = 0.7966

```

```
28 . signrank new1neut=new2neut if hiv2s==1 & outcome==0
```

```
Wilcoxon signed-rank test
```

| sign     | obs | sum ranks | expected |
|----------|-----|-----------|----------|
| positive | 2   | 14        | 38.5     |
| negative | 9   | 63        | 38.5     |
| zero     | 1   | 1         | 1        |
| all      | 12  | 78        | 78       |

```

unadjusted variance    162.50
adjustment for ties    0.00
adjustment for zeros   -0.25
-----
adjusted variance      162.25

```

```

Ho: new1neut = new2neut
    z = -1.923
Prob > |z| = 0.0544
Exact Prob = 0.0576

```

```
29 . signrank new1band=new2band if hiv2s==1 & outcome==0
```

```
Wilcoxon signed-rank test
```

| sign     | obs | sum ranks | expected |
|----------|-----|-----------|----------|
| positive | 8   | 63        | 38.5     |
| negative | 3   | 14        | 38.5     |
| zero     | 1   | 1         | 1        |
| all      | 12  | 78        | 78       |

unadjusted variance      162.50  
 adjustment for ties      0.00  
 adjustment for zeros     -0.25

adjusted variance        162.25

Ho: newlband = new2band  
 z = 1.923  
 Prob > |z| = 0.0544  
 Exact Prob = 0.0576

30 . signrank bandlperc=band2perc if hivs==1 & outcome==0

Wilcoxon signed-rank test

| sign     | obs | sum ranks | expected |
|----------|-----|-----------|----------|
| positive | 4   | 14        | 7        |
| negative | 0   | 0         | 7        |
| zero     | 1   | 1         | 1        |
| all      | 5   | 15        | 15       |

unadjusted variance      13.75  
 adjustment for ties      0.00  
 adjustment for zeros     -0.25

adjusted variance        13.50

Ho: bandlperc = band2perc  
 z = 1.905  
 Prob > |z| = 0.0568  
 Exact Prob = 0.1250

31 . signrank newlplat=new2plat if hiv2s==1 & outcome==0

Wilcoxon signed-rank test

| sign     | obs | sum ranks | expected |
|----------|-----|-----------|----------|
| positive | 10  | 111       | 203      |
| negative | 18  | 295       | 203      |
| zero     | 0   | 0         | 0        |
| all      | 28  | 406       | 406      |

unadjusted variance      1928.50  
 adjustment for ties      -0.25  
 adjustment for zeros     0.00

adjusted variance        1928.25

Ho: newlplat = new2plat  
 z = -2.095  
 Prob > |z| = 0.0362  
 Exact Prob = 0.0352

32 .  
 33 . \*HIV positive - dead

34 . signrank newlwcc=new2wcc if hiv2s==1 & outcome==1

Wilcoxon signed-rank test

| sign     | obs | sum ranks | expected |
|----------|-----|-----------|----------|
| positive | 11  | 86        | 85.5     |
| negative | 7   | 85        | 85.5     |
| zero     | 0   | 0         | 0        |
| all      | 18  | 171       | 171      |

unadjusted variance      527.25  
 adjustment for ties      0.00  
 adjustment for zeros     0.00

adjusted variance        527.25

```

Ho: newlwcc = new2wcc
      z = 0.022
Prob > |z| = 0.9826
Exact Prob = 1.0000

```

```
35 . signrank newlneut=new2neut if hiv2s==1 & outcome==1
```

Wilcoxon signed-rank test

| sign     | obs | sum ranks | expected |
|----------|-----|-----------|----------|
| positive | 9   | 66        | 52.5     |
| negative | 5   | 39        | 52.5     |
| zero     | 0   | 0         | 0        |
| all      | 14  | 105       | 105      |

```

unadjusted variance    253.75
adjustment for ties    0.00
adjustment for zeros    0.00

```

```
adjusted variance      253.75
```

```

Ho: newlneut = new2neut
      z = 0.847
Prob > |z| = 0.3967
Exact Prob = 0.4263

```

```
36 . signrank newlband=new2band if hiv2s==1 & outcome==1
```

Wilcoxon signed-rank test

| sign     | obs | sum ranks | expected |
|----------|-----|-----------|----------|
| positive | 7   | 54        | 52       |
| negative | 6   | 50        | 52       |
| zero     | 1   | 1         | 1        |
| all      | 14  | 105       | 105      |

```

unadjusted variance    253.75
adjustment for ties    0.00
adjustment for zeros   -0.25

```

```
adjusted variance      253.50
```

```

Ho: newlband = new2band
      z = 0.126
Prob > |z| = 0.9000
Exact Prob = 0.9272

```

```
37 . signrank bandlperc=band2perc if hivs==1 & outcome==1
```

Wilcoxon signed-rank test

| sign     | obs | sum ranks | expected |
|----------|-----|-----------|----------|
| positive | 3   | 8         | 7.5      |
| negative | 2   | 7         | 7.5      |
| zero     | 0   | 0         | 0        |
| all      | 5   | 15        | 15       |

```

unadjusted variance    13.75
adjustment for ties    0.00
adjustment for zeros    0.00

```

```
adjusted variance      13.75
```

```

Ho: bandlperc = band2perc
      z = 0.135
Prob > |z| = 0.8927
Exact Prob = 1.0000

```

```
38 . signrank newlplat=new2plat if hiv2s==1 & outcome==1
```

Wilcoxon signed-rank test

| sign     | obs | sum ranks | expected |
|----------|-----|-----------|----------|
| positive | 8   | 73        | 76.5     |
| negative | 9   | 80        | 76.5     |
| zero     | 0   | 0         | 0        |
| all      | 17  | 153       | 153      |



|                      |        |
|----------------------|--------|
| unadjusted variance  | 446.25 |
| adjustment for ties  | -0.12  |
| adjustment for zeros | 0.00   |
|                      | <hr/>  |
| adjusted variance    | 446.12 |

Ho: new1plat = new2plat  
z = -0.166  
Prob > |z| = 0.8684  
Exact Prob = 0.8803

39 .

40 .
