# Supplementary material for: Association of full blood count findings with risk of mortality in children with Klebsiella pneumoniae bloodstream infection at a south african children’s hospital
Source: Springer Nature journal article supplement (doi:10.1186/s12887-023-04104-z), 2023-06-17
Supplement: MOESM2 [file 25507006]

```

1 .
2 . * Descriptions
3 . bysort hiv2: tabstat newlwcc new2wcc if hiv2s!=., by(outcome) stats (p50 p25 p75)

```

---

```

-> hiv2s = 0

```

```

Summary statistics: p50, p25, p75
by categories of: outcome (Outcome)

```

| outcome | newlwcc | new2wcc |
|---------|---------|---------|
| Alive   | 11.7    | 11.13   |
|         | 7.2     | 8.19    |
|         | 20.07   | 16.89   |
| Died    | 12.57   | 13.08   |
|         | 5.9     | 5.2     |
|         | 21.87   | 23.6    |
| Total   | 11.9    | 11.545  |
|         | 6.6     | 7.68    |
|         | 21      | 17.72   |

---

```

-> hiv2s = 1

```

```

Summary statistics: p50, p25, p75
by categories of: outcome (Outcome)

```

| outcome | newlwcc | new2wcc |
|---------|---------|---------|
| Alive   | 9.305   | 9.9     |
|         | 4.95    | 7       |
|         | 13.2    | 12.55   |
| Died    | 8.82    | 9.35    |
|         | 3       | 4.1     |
|         | 20.26   | 12.08   |
| Total   | 8.82    | 9.9     |
|         | 4       | 5.7     |
|         | 16.57   | 12.4    |

```

4 . bysort hiv2: tabstat newlneut new2neut if hiv2s!=., by(outcome) stats (p50 p25 p75)

```

---

```

-> hiv2s = 0

```

```

Summary statistics: p50, p25, p75
by categories of: outcome (Outcome)

```

| outcome | newlneut | new2neut |
|---------|----------|----------|
| Alive   | 5.61     | 4.42     |
|         | 2.8      | 2.1      |
|         | 10.275   | 8.33     |
| Died    | 4.63     | 6.325    |
|         | .76      | 1.33     |
|         | 12.69    | 15.1     |
| Total   | 5.09     | 4.42     |
|         | 2.2      | 1.84     |
|         | 10.37    | 10.06    |

---

```

-> hiv2s = 1

```

```

Summary statistics: p50, p25, p75
by categories of: outcome (Outcome)

```

| outcome | newlneut | new2neut |
|---------|----------|----------|
| Alive   | 3.63     | 3.995    |
|         | .99      | 2.31     |
|         | 7.28     | 5.56     |
| Died    | 2.9      | 3.41     |
|         | .62      | 1.41     |
|         | 8.45     | 6.29     |

| Total | 3.36  | 3.735 |
|-------|-------|-------|
|       | .865  | 1.72  |
|       | 7.865 | 6.02  |

```
5 . bysort hiv2: tabstat new1band new2band if hiv2s!., by(outcome) stats (p50 p25 p75)
```

```
-> hiv2s = 0
```

```
Summary statistics: p50, p25, p75  
by categories of: outcome (Outcome)
```

| outcome | new1band | new2band |
|---------|----------|----------|
| Alive   | 1.385    | .41      |
|         | .305     | .13      |
|         | 3.645    | 1.43     |
| Died    | 1.81     | .495     |
|         | .22      | .18      |
|         | 4.37     | 2.31     |
| Total   | 1.4      | .44      |
|         | .27      | .13      |
|         | 3.66     | 1.53     |

```
-> hiv2s = 1
```

```
Summary statistics: p50, p25, p75  
by categories of: outcome (Outcome)
```

| outcome | new1band | new2band |
|---------|----------|----------|
| Alive   | 1.525    | .19      |
|         | .41      | .035     |
|         | 4.18     | .99      |
| Died    | 1.65     | 1.245    |
|         | .25      | .35      |
|         | 4.96     | 3.5      |
| Total   | 1.57     | .49      |
|         | .34      | .07      |
|         | 4.6      | 1.47     |

```
6 . bysort hiv2: tabstat band1perc band2perc if hiv2s!., by(outcome) stats (p50 p25 p75)
```

```
-> hiv2s = 0
```

```
Summary statistics: p50, p25, p75  
by categories of: outcome (Outcome)
```

| outcome | band1p-c | band2p-c |
|---------|----------|----------|
| Alive   | 13.47349 | 5.431573 |
|         | 3.011608 | .9760301 |
|         | 26.45713 | 12.50106 |
| Died    | 13.9967  | 7.982301 |
|         | 2.012809 | .9788769 |
|         | 27.01835 | 13.98305 |
| Total   | 13.96825 | 5.990539 |
|         | 3.010033 | .9764503 |
|         | 26.89655 | 13.00211 |

```
-> hiv2s = 1
```

```
Summary statistics: p50, p25, p75  
by categories of: outcome (Outcome)
```

| outcome | band1p-c | band2p-c |
|---------|----------|----------|
| Alive   | 19.45364 | 2.025195 |
|         | 6.8      | .472973  |
|         | 29.01099 | 11       |
| Died    | 17.02335 | 16.9746  |

|       | 8        | 10       |
|-------|----------|----------|
|       | 27.98527 | 25.95745 |
| Total | 18.50218 | 10       |
|       | 7.970823 | .9876543 |
|       | 28.01325 | 16.98842 |

```
7 . bysort hiv2: tabstat new1plat new2plat if hiv2s!=., by(outcome) stats (p50 p25 p75)
```

```
-> hiv2s = 0
```

```
Summary statistics: p50, p25, p75
by categories of: outcome (Outcome)
```

| outcome | new1plat | new2plat |
|---------|----------|----------|
| Alive   | 204      | 239      |
|         | 78       | 110      |
|         | 383.5    | 499      |
| Died    | 61       | 40.5     |
|         | 18       | 16       |
|         | 136      | 142      |
| Total   | 142.5    | 209      |
|         | 48       | 64       |
|         | 313      | 455      |

```
-> hiv2s = 1
```

```
Summary statistics: p50, p25, p75
by categories of: outcome (Outcome)
```

| outcome | new1plat | new2plat |
|---------|----------|----------|
| Alive   | 92.5     | 132.5    |
|         | 22       | 45       |
|         | 238      | 233.5    |
| Died    | 42       | 63.5     |
|         | 11       | 17       |
|         | 140      | 143      |
| Total   | 59       | 98.5     |
|         | 18       | 36       |
|         | 173      | 204      |

```
8 .
9 . *Hypothesis testing

10 .
11 . *HIV negative - alive

12 . signrank newlwcc=new2wcc if hiv2s==0 & outcome==0
```

```
Wilcoxon signed-rank test
```

| sign     | obs | sum ranks | expected |
|----------|-----|-----------|----------|
| positive | 48  | 2053.5    | 1958     |
| negative | 40  | 1862.5    | 1958     |
| zero     | 0   | 0         | 0        |
| all      | 88  | 3916      | 3916     |

```
unadjusted variance 57761.00
adjustment for ties -0.25
adjustment for zeros 0.00
adjusted variance 57760.75
```

```
Ho: newlwcc = new2wcc
z = 0.397
Prob > |z| = 0.6911
Exact Prob = 0.6933
```

```
13 . signrank newlneut=new2neut if hiv2s==0 & outcome==0
```

```
Wilcoxon signed-rank test
```

| sign | obs | sum ranks | expected |
|------|-----|-----------|----------|
|------|-----|-----------|----------|

| positive | 29 | 829.5 | 688.5 |
|----------|----|-------|-------|
| negative | 22 | 547.5 | 688.5 |
| zero     | 1  | 1     | 1     |
| all      | 52 | 1378  | 1378  |

unadjusted variance    **12057.50**  
 adjustment for ties    **-0.12**  
 adjustment for zeros   **-0.25**  
 -----  
 adjusted variance      **12057.12**

Ho: newlneut = new2neut  
 z = **1.284**  
 Prob > |z| = **0.1991**  
 Exact Prob = **0.2017**

14 . signrank newlband=new2band if hiv2s==0 & outcome==0

Wilcoxon signed-rank test

| sign     | obs | sum ranks | expected |
|----------|-----|-----------|----------|
| positive | 33  | 1026      | 684      |
| negative | 15  | 342       | 684      |
| zero     | 4   | 10        | 10       |
| all      | 52  | 1378      | 1378     |

unadjusted variance    **12057.50**  
 adjustment for ties    **0.00**  
 adjustment for zeros   **-7.50**  
 -----  
 adjusted variance      **12050.00**

Ho: newlband = new2band  
 z = **3.116**  
 Prob > |z| = **0.0018**  
 Exact Prob = **0.0015**

15 . signrank bandlperc=band2perc if hivs==0 & outcome==0

Wilcoxon signed-rank test

| sign     | obs | sum ranks | expected |
|----------|-----|-----------|----------|
| positive | 32  | 826       | 539      |
| negative | 12  | 252       | 539      |
| zero     | 2   | 3         | 3        |
| all      | 46  | 1081      | 1081     |

unadjusted variance    **8377.75**  
 adjustment for ties    **0.00**  
 adjustment for zeros   **-1.25**  
 -----  
 adjusted variance      **8376.50**

Ho: bandlperc = band2perc  
 z = **3.136**  
 Prob > |z| = **0.0017**  
 Exact Prob = **0.0013**

16 . signrank newlplat=new2plat if hiv2s==0 & outcome==0

Wilcoxon signed-rank test

| sign     | obs | sum ranks | expected |
|----------|-----|-----------|----------|
| positive | 28  | 919.5     | 1743     |
| negative | 55  | 2566.5    | 1743     |
| zero     | 0   | 0         | 0        |
| all      | 83  | 3486      | 3486     |

unadjusted variance    **48513.50**  
 adjustment for ties    **-2.12**  
 adjustment for zeros   **0.00**  
 -----  
 adjusted variance      **48511.38**

Ho: newlplat = new2plat  
 z = **-3.739**  
 Prob > |z| = **0.0002**  
 Exact Prob = **0.0001**

```
17 .
18 . *HIV negative - dead
19 . signrank newlwcc=new2wcc if hiv2s==0 & outcome==1
```

Wilcoxon signed-rank test

| sign     | obs | sum ranks | expected |
|----------|-----|-----------|----------|
| positive | 12  | 152       | 126.5    |
| negative | 10  | 101       | 126.5    |
| zero     | 0   | 0         | 0        |
| all      | 22  | 253       | 253      |

```
unadjusted variance    948.75
adjustment for ties    0.00
adjustment for zeros   0.00
```

```
adjusted variance      948.75
```

Ho: newlwcc = new2wcc

```
z = 0.828
Prob > |z| = 0.4077
Exact Prob = 0.4245
```

```
20 . signrank newlneut=new2neut if hiv2s==0 & outcome==1
```

Wilcoxon signed-rank test

| sign     | obs | sum ranks | expected |
|----------|-----|-----------|----------|
| positive | 7   | 65        | 67.5     |
| negative | 8   | 70        | 67.5     |
| zero     | 1   | 1         | 1        |
| all      | 16  | 136       | 136      |

```
unadjusted variance    374.00
adjustment for ties    0.00
adjustment for zeros   -0.25
```

```
adjusted variance      373.75
```

Ho: newlneut = new2neut

```
z = -0.129
Prob > |z| = 0.8971
Exact Prob = 0.9199
```

```
21 . signrank newlband=new2band if hiv2s==0 & outcome==1
```

Wilcoxon signed-rank test

| sign     | obs | sum ranks | expected |
|----------|-----|-----------|----------|
| positive | 10  | 102       | 66.5     |
| negative | 4   | 31        | 66.5     |
| zero     | 2   | 3         | 3        |
| all      | 16  | 136       | 136      |

```
unadjusted variance    374.00
adjustment for ties    0.00
adjustment for zeros   -1.25
```

```
adjusted variance      372.75
```

Ho: newlband = new2band

```
z = 1.839
Prob > |z| = 0.0660
Exact Prob = 0.0691
```

```
22 . signrank bandlperc=band2perc if hivs==0 & outcome==1
```

Wilcoxon signed-rank test

| sign     | obs | sum ranks | expected |
|----------|-----|-----------|----------|
| positive | 9   | 86        | 51       |
| negative | 3   | 16        | 51       |
| zero     | 2   | 3         | 3        |
| all      | 14  | 105       | 105      |

```
unadjusted variance    253.75
```

```

adjustment for ties      0.00
adjustment for zeros    -1.25
-----
adjusted variance      252.50

```

```

Ho: band1perc = band2perc
   z = 2.203
Prob > |z| = 0.0276
Exact Prob = 0.0264

```

```
23 . signrank new1plat=new2plat if hiv2s==0 & outcome==1
```

```
Wilcoxon signed-rank test
```

| sign     | obs | sum ranks | expected |
|----------|-----|-----------|----------|
| positive | 15  | 171       | 115.5    |
| negative | 6   | 60        | 115.5    |
| zero     | 0   | 0         | 0        |
| all      | 21  | 231       | 231      |

```

unadjusted variance      827.75
adjustment for ties      0.00
adjustment for zeros      0.00
-----
adjusted variance      827.75

```

```

Ho: new1plat = new2plat
   z = 1.929
Prob > |z| = 0.0537
Exact Prob = 0.0547

```

```
24 .
```

```
25 .
```

```
26 . *HIV positive- alive
```

```
27 . signrank new1wcc=new2wcc if hiv2s==1 & outcome==0
```

```
Wilcoxon signed-rank test
```

| sign     | obs | sum ranks | expected |
|----------|-----|-----------|----------|
| positive | 13  | 191       | 203      |
| negative | 15  | 215       | 203      |
| zero     | 0   | 0         | 0        |
| all      | 28  | 406       | 406      |

```

unadjusted variance      1928.50
adjustment for ties      0.00
adjustment for zeros      0.00
-----
adjusted variance      1928.50

```

```

Ho: new1wcc = new2wcc
   z = -0.273
Prob > |z| = 0.7847
Exact Prob = 0.7966

```

```
28 . signrank new1neut=new2neut if hiv2s==1 & outcome==0
```

```
Wilcoxon signed-rank test
```

| sign     | obs | sum ranks | expected |
|----------|-----|-----------|----------|
| positive | 2   | 14        | 38.5     |
| negative | 9   | 63        | 38.5     |
| zero     | 1   | 1         | 1        |
| all      | 12  | 78        | 78       |

```

unadjusted variance      162.50
adjustment for ties      0.00
adjustment for zeros     -0.25
-----
adjusted variance      162.25

```

```

Ho: new1neut = new2neut
   z = -1.923
Prob > |z| = 0.0544
Exact Prob = 0.0576

```

```
29 . signrank new1band=new2band if hiv2s==1 & outcome==0
```

```
Wilcoxon signed-rank test
```

| sign     | obs | sum ranks | expected |
|----------|-----|-----------|----------|
| positive | 8   | 63        | 38.5     |
| negative | 3   | 14        | 38.5     |
| zero     | 1   | 1         | 1        |
| all      | 12  | 78        | 78       |

unadjusted variance      162.50  
 adjustment for ties      0.00  
 adjustment for zeros      -0.25

adjusted variance      162.25

Ho: new1band = new2band  
 $z = 1.923$   
 Prob >  $|z| = 0.0544$   
 Exact Prob = 0.0576

30 . signrank band1perc=band2perc if hivs==1 & outcome==0

Wilcoxon signed-rank test

| sign     | obs | sum ranks | expected |
|----------|-----|-----------|----------|
| positive | 4   | 14        | 7        |
| negative | 0   | 0         | 7        |
| zero     | 1   | 1         | 1        |
| all      | 5   | 15        | 15       |

unadjusted variance      13.75  
 adjustment for ties      0.00  
 adjustment for zeros      -0.25

adjusted variance      13.50

Ho: band1perc = band2perc  
 $z = 1.905$   
 Prob >  $|z| = 0.0568$   
 Exact Prob = 0.1250

31 . signrank new1plat=new2plat if hiv2s==1 & outcome==0

Wilcoxon signed-rank test

| sign     | obs | sum ranks | expected |
|----------|-----|-----------|----------|
| positive | 10  | 111       | 203      |
| negative | 18  | 295       | 203      |
| zero     | 0   | 0         | 0        |
| all      | 28  | 406       | 406      |

unadjusted variance      1928.50  
 adjustment for ties      -0.25  
 adjustment for zeros      0.00

adjusted variance      1928.25

Ho: new1plat = new2plat  
 $z = -2.095$   
 Prob >  $|z| = 0.0362$   
 Exact Prob = 0.0352

32 .  
 33 . \*HIV positive - dead

34 . signrank new1wcc=new2wcc if hiv2s==1 & outcome==1

Wilcoxon signed-rank test

| sign     | obs | sum ranks | expected |
|----------|-----|-----------|----------|
| positive | 11  | 86        | 85.5     |
| negative | 7   | 85        | 85.5     |
| zero     | 0   | 0         | 0        |
| all      | 18  | 171       | 171      |

unadjusted variance      527.25  
 adjustment for ties      0.00  
 adjustment for zeros      0.00

adjusted variance      527.25

```

Ho: newlwcc = new2wcc
      z = 0.022
Prob > |z| = 0.9826
Exact Prob = 1.0000

```

```
35 . signrank newlneut=new2neut if hiv2s==1 & outcome==1
```

Wilcoxon signed-rank test

| sign     | obs | sum ranks | expected |
|----------|-----|-----------|----------|
| positive | 9   | 66        | 52.5     |
| negative | 5   | 39        | 52.5     |
| zero     | 0   | 0         | 0        |
| all      | 14  | 105       | 105      |

```

unadjusted variance    253.75
adjustment for ties    0.00
adjustment for zeros    0.00

```

```
adjusted variance      253.75
```

```

Ho: newlneut = new2neut
      z = 0.847
Prob > |z| = 0.3967
Exact Prob = 0.4263

```

```
36 . signrank newlband=new2band if hiv2s==1 & outcome==1
```

Wilcoxon signed-rank test

| sign     | obs | sum ranks | expected |
|----------|-----|-----------|----------|
| positive | 7   | 54        | 52       |
| negative | 6   | 50        | 52       |
| zero     | 1   | 1         | 1        |
| all      | 14  | 105       | 105      |

```

unadjusted variance    253.75
adjustment for ties    0.00
adjustment for zeros   -0.25

```

```
adjusted variance      253.50
```

```

Ho: newlband = new2band
      z = 0.126
Prob > |z| = 0.9000
Exact Prob = 0.9272

```

```
37 . signrank bandlperc=band2perc if hivs==1 & outcome==1
```

Wilcoxon signed-rank test

| sign     | obs | sum ranks | expected |
|----------|-----|-----------|----------|
| positive | 2   | 3         | 1.5      |
| negative | 0   | 0         | 1.5      |
| zero     | 0   | 0         | 0        |
| all      | 2   | 3         | 3        |

```

unadjusted variance    1.25
adjustment for ties    0.00
adjustment for zeros    0.00

```

```
adjusted variance      1.25
```

```

Ho: bandlperc = band2perc
      z = 1.342
Prob > |z| = 0.1797
Exact Prob = 0.5000

```

```
38 . signrank newlplat=new2plat if hiv2s==1 & outcome==1
```

Wilcoxon signed-rank test

| sign     | obs | sum ranks | expected |
|----------|-----|-----------|----------|
| positive | 8   | 73        | 76.5     |
| negative | 9   | 80        | 76.5     |
| zero     | 0   | 0         | 0        |
| all      | 17  | 153       | 153      |



|                      |        |
|----------------------|--------|
| unadjusted variance  | 446.25 |
| adjustment for ties  | -0.12  |
| adjustment for zeros | 0.00   |
|                      | <hr/>  |
| adjusted variance    | 446.12 |

Ho: new1plat = new2plat  
z = -0.166  
Prob > |z| = 0.8684  
Exact Prob = 0.8803

39 .

40 .
